# Cross-Linking of $\beta$ -Lactoglobulin Enhances Allergic Sensitization Through Changes in Cellular Uptake and Processing

Marija Stojadinovic,\* Raymond Pieters,<sup>†</sup> Joost Smit,<sup>†,1</sup> and Tanja Cirkovic Velickovic\*<sup>1,2</sup>

\*University of Belgrade, Faculty of Chemistry, 11 000 Belgrade, Serbia; and <sup>†</sup>Institute for Risk Assessment Sciences, Utrecht University, 3508 TD Utrecht, The Netherlands

<sup>1</sup>These authors contributed equally to this study.

<sup>2</sup>To whom correspondence should be addressed at University of Belgrade, Faculty of Chemistry, Studentski trg 16, 11 000 Belgrade, Serbia.

Fax: +381112184330. E-mail: tcirkov@chem.bg.ac.rs.

Received February 13, 2014; accepted March 28, 2014

Cross-linking of proteins has been exploited by the food industry to change food texture and functionality but the effects of these manipulations on food allergenicity still remain unclear. To model the safety assessment of these food biopolymers, we created cross-linked bovine  $\beta$ -lactoglobulin (CL-BLG) by laccase treatment. The purpose of the present study was to compare the immunogenicity and allergenicity of CL-BLG with native BLG in a mouse model of food allergy. First, BALB/c mice were intragastrically sensitized and orally challenged with BLG or CL-BLG and BLG-specific serum antibodies and splenic leukocyte cytokine production and cell proliferation were measured. Hereafter, epithelial protein uptake was monitored *in vitro* and *in vivo* and the effects of BLG cross-linking on interactions with dendritic cells were analyzed *in vitro*. Sensitization of mice with CL-BLG resulted in higher levels of IgE, IgG1, and IgG2a. In contrast, a subsequent oral challenge with CL-BLG resulted in lower mast cell degranulation. Cross-linking of BLG reduced its epithelial uptake but promoted sampling through Peyer's patches. Differences in endocytosis by dendritic cells (DCs) and *in vitro* endolysosomal processing were observed between BLG and CL-BLG. CL-BLG primed DCs induced higher Th2 response *in vitro*. Cross-linking of BLG increased its sensitizing capacity, implying that the assessment of highly polymerized food proteins is of clinical importance in food allergy. Moreover, manufacturers of foods or therapeutic proteins should pay considerate attention to the health risk of protein aggregation.

**Key words:** protein cross-linking; protein aggregation; food processing; allergic sensitization;  $\beta$ -lactoglobulin; mouse model of food allergy.

Food taste determines our eating habits since early age. Taste is the outcome of all food sensory properties: color, flavor, and texture. Food texture is related to structure, mechanical, and rheological properties of food matrix (ISO 5492:2008). Improvement of food structure can be achieved in many ways, such as by creation of covalent cross-links between food components

**Disclaimer:** The EC does not share responsibility for the content of the article. The authors are members of the COST Action FA 1005 Infogest.

(e.g., proteins and carbohydrates). Cross-linking of proteins has been exploited in the food industry for cereal, dairy, meat, and fish processing. Enzymes as agents for protein cross-linking have been suggested as more useful than chemical or physical means due to their high specificity, mild conditions and therefore low risk of formation of toxic products. Cross-linking enzymes used for this purpose are transglutaminases, peroxidases, phenol oxidases (tyrosinases and laccase), and sulfhydryl oxidases (Buchert *et al.*, 2010). Although transglutaminases are the only cross-linking enzymes approved in the current European Union (EU) legislation on food enzymes (EU regulation 1332/2008), it seems only a matter of time before other cross-linking enzymes, especially multifunctional phenol oxidases, are allowed as technological aid.

Although tailoring of protein structure is necessary for creation of new functional properties, there is a risk of creating foods with increased allergic potential. Therefore, all new proteins and protein derivatives need to be tested for allergenicity before they are released into the food market (FAO/WHO, 2001). Considerations in the assessment of allergic potential of novel foods are: (1) prevention of development of *de novo* hypersensitivity/allergy and (2) prevention of increase of allergenic potential of allergens already present in foods (Food Directorate, Health Products and Food Branch, Health Canada, 2006). The effect of enzymatic cross-linking on food protein allergenicity has been investigated before, mainly by *in vitro* tests. For instance, transglutaminase treatment of peanut proteins, wheat flour,  $\beta$ -casein, and  $\omega$ -5 gliadin showed variable effects on the allergenicity of proteins (Clare *et al.*, 2006; Leszczyńska *et al.*, 2006; Monogioudi *et al.*, 2011; Palosuo *et al.*, 2003), but polyphenol oxidases reduced the IgE binding capacity of peanut Ara h 1 and 2, milk  $\beta$ -casein and  $\beta$ -lactoglobulin (BLG) (Chung *et al.*, 2005; Stanic *et al.*, 2010; Tantoush *et al.*, 2011). Variable observations between these studies suggest that assessment of allergenicity, let alone of immunogenicity, of cross-linked proteins is not straightforward and is influenced by features inherent to protein structure (complexity of tertiary structure, linear

vs. conformational epitopes), extent of cross-linking (polymerization efficiency, polymer size, utilization of mediators) and type of enzymes used (reactivity toward different amino acid side chains).

BLG is a well-studied small globular protein present at around 50% in bovine whey (Kontopidis *et al.*, 2004). Because of high nutritional value and desirable techno-functional properties, this protein is frequently used as an additive in many food products (Stanić-Vučinić and Ćirković Veličković, 2013). On the other hand, BLG is one of major milk allergens, recognized by ~50% of cow's milk allergic patients (Nakano *et al.*, 2010; Natale *et al.*, 2004). Enzymatic cross-linking was investigated for the improvement of the functionality of BLG (Eissa *et al.*, 2006), but because of its compact tertiary structure (target amino acid residues are hindered for the enzyme) reaction efficiency is often low. However, by using high intensity ultrasound (to alter protein tertiary structure) prior to enzymatic reaction with laccase, we efficiently cross-linked BLG into high molecular weight aggregates (Stanic-Vucinic *et al.*, 2012). The proposed process is economical and environmentally friendly, offers a good end-product that can be used in many types of foods and beverages. The obtained product (CL-BLG) possesses different structures and physicochemical properties than native protein (solubility is decreased, tertiary and secondary structures are altered, size is increased) and will presumably exhibit different biological behavior.

Because BLG sensitizes through gastrointestinal tract (GIT), we used an established mouse model of food allergy in which proteins are administered orally to address both the sensitizing and allergenic potency of CL-BLG. To explain the results observed in this model, we followed (1) protein digestibility and transport in the GIT and (2) processing and presentation by dendritic cells. Our data demonstrate that cross-linking of BLG promoted both immunogenicity and allergenicity in mice by changing protein digestibility and transport in the GIT, as well as the processing by dendritic cells.

## MATERIALS AND METHODS

**Protein sample preparation and characterization.** BLG was isolated from raw bovine milk and CL-BLG was prepared as published before (Stanic-Vucinic *et al.*, 2012), brief description is included in Supplementary data. Proteins were conjugated to pHrodo Green succinimidyl ester (Invitrogen, Life Technologies, Breda, The Netherlands) and FITC-succinimidyl ester (Sigma-Aldrich, Taufkirchen, Germany) according to the manufacturer's instructions. For *in vitro* cell experiments, lipopolysaccharide (LPS) content in protein samples was reduced by affinity chromatography on Polymyxin B-agarose raisins following manufacturer's instructions (Bio-Rad Laboratories, Richmond, CA). Protein concentration was determined with bicinchoninic acid (BCA)-assay (Pierce, Amsterdam, The Netherlands). Agarose gel electrophoresis and scanning elec-

tron microscopy (SEM) were performed to determine CL-BLG molecular weight and morphology (Supplementary data).

**Cell cultures.** Conditions for cell culture media used in the paper are listed in the Supplementary data.

**Mice.** Five-week-old specific pathogen-free female BALB/c and C3H/HeOuJ mice were purchased from Charles River (Sulzfeld, Germany). All mice were housed under specific pathogen-free conditions within the animal care facility at the Utrecht University. Experiments have been approved by the Animal Experiments Committee of the Utrecht University.

**Sensitization model.** Murine sensitization protocol was similar to previously described one (Kanjarawi *et al.*, 2011). BALB/c mice were intragastrically (ig) sensitized with 5 mg of BLG or CL-BLG with 15  $\mu$ g of Cholera Toxin (CT, List Biological Laboratories, Inc., CA) on days 0, 7, 14, and 21 ( $n = 8$ /group). Control group received PBS instead of protein ( $n = 6$ ). All mice received a challenge dose of 15 mg of BLG or CL-BLG on day 28. Levels of BLG-specific IgE, IgG1, and IgG2a were determined in sera before the challenge (from day 24) by in-house ELISA (Supplementary data). Concentration of mouse mast cell protease-1 (mMCP-1) was determined in sera obtained on day 28 within 60 min after the oral challenge, using a commercially available ELISA (Moredun Scientific Ltd, Midlothian, UK). Splenic cells were incubated with 50  $\mu$ g/ml of BLG for 72 h. Subsequently, in the culture supernatants, levels of IFN- $\gamma$ , IL-5, and IL-13 were determined by commercially available ELISA (e-Bioscience, Austria). Cell proliferation was assessed by  $^3$ H-thymidine incorporation (Supplementary data).

**Transport through Caco-2 cells.** For transport studies, Caco-2 cells were seeded at  $6.8 \times 10^4$  cells/cm $^2$  on polycarbonate membranes with a pore size of 0.4  $\mu$ m in 12-well plates (Transwell, Corning Costar, Cambridge, MA). Cells at passages of 59–68 were used in experiments at the age of 21–24 days and the cultures were fed three times per week. Prior to the transport studies and at the end of experiment, transepithelial electrical resistance (TEER) was measured using Millicell-ERS Volt-Ohmmeter (Millipore, Amsterdam, The Netherlands). Only cell monolayers with TEER  $>500 \Omega$  were used. Transport studies were done with 50 or 500  $\mu$ g of BLG and CL-BLG in Dulbecco's modified eagle's medium (DMEM) culture medium in 500  $\mu$ l (0.1 or 1 mg/ml). Aliquots were withdrawn from the receiver compartment at indicated time points and transported BLG and CL-BLG were detected by commercially available ELISA kit (Bethyl Laboratories, Inc., Montgomery).

**In vivo transport through mouse intestinal tract.** BALB/c mice ( $n = 3$ /group) were exposed by oral gavage with 4 mg of FITC labeled BLG or CL-BLG. Subsequently, animals were sacrificed after 15 and 30 min and the whole intestine was thor-

oroughly rinsed with PBS and immediately frozen in liquid nitrogen. Seven micrometers sections were cut, counterstained with 4',6-diamidino-2-phenylindole (DAPI) and anti-M-cell antibody (antimouse glycoprotein-2 antibody (GP-2), MBL International, Woburn, MA). Fluorescent micrographs were obtained with Olympus microscope BX60 equipped with color CCD camera Leica DFC425C and analyzed by LEICA-LAS AF software (Leica Microsystems GmbH, Germany).

*Simulation of gastrointestinal degradation of proteins—in vitro biphasal digestion assay.* Simulated gastric (SGD) and intestinal digestion (SID) were conducted in accordance with U.S. Pharmacopoeia. SGD was performed according to Thomas *et al.* (2004), with slight modifications. Briefly, a tube with 0.76 ml of simulated gastric fluid (SGF; 0.084N HCl, 35mM NaCl, pH 1.2, and 4000 U of pepsin A (2540 U/mg, Sigma-Aldrich)) was prewarmed at 37°C and 40  $\mu$ l of 5 mg/ml BLG or CL-BLG solution were added. Digestion proceeded at 37°C for 60 min under continuous shaking. Subsequently, digestion was stopped by addition of 0.24 ml of 0.3M Na<sub>2</sub>CO<sub>3</sub> to give pH of 8.0. A sample was taken.

Pancreatin from porcine pancreas (Sigma-Aldrich) was dissolved in 200mM sodium phosphate buffer with 1.8% NaCl, pH 7.4. To 0.84 ml of previously incubated SGD mixture, 0.21 ml of pancreatin solution was added to give final pancreatin concentration 1% (wt/vol) and digestion continued at 37°C under continuous shaking. Pancreatic enzymes:protein mass ratio was 13:1 as described elsewhere (Stanic *et al.*, 2010). Aliquots of 0.25 ml were withdrawn after 5, 15, 30, and 60 min of SID and reaction was stopped by boiling for 5 min at 95°C. To the remaining 0.2 ml of SGD mixture, sample of previously incubated, 0.05 ml of heat inactivated pancreatin solution was added. This mixture was marked as the time point 0 for SID. Samples were run on 14% SDS-PAGE under reducing conditions according to Laemmli (1970). Digestion pattern was analyzed after staining with silver nitrate as described by Swain and Ross (1995).

*Protein uptake by DCs.* Bone marrow cells from BALB/c were isolated and cultured in cell culturing medium supplemented with GM-CSF (10 ng/ml, R&D, Oxon, UK), as previously described (Lutz *et al.*, 1999). Only 6-day-old BMDCs (differentiated from bone marrow cells isolated from BALB/c mice) were used for the following experiments. To access protein uptake and endocytosis, 10  $\mu$ g of fluorescein isothiocyanate (FITC) or pHrodo Green-labeled BLG or CL-BLG were incubated with  $1 \times 10^6$  BMDCs in 1 ml of cell culture medium for 0, 15, 30, 60, 120, 180, and 240 min. Percentage of FITC or pHrodo Green-positive DCs was measured using FACSCalibur flow cytometer (BD Biosciences). Flow cytometry data were analyzed in Cyflog software (CyFlo Ltd, Turku, Finland). Stimulations were conducted in triplicates.

*Simulation of protein processing in DCs—in vitro endolysosomal degradation.* Endolysosomal fraction was isolated from BMDCs, as published before (Matthias *et al.*, 2011). Holo-HRP was one of the proteins digested by microsomal content in Matthias *et al.* (2011) study with half-life of 66 min. We digested Holo-HRP (Sigma-Aldrich) with our microsomal preparation under the same conditions and determined protein half-life to be 54 min (Supplementary fig. E1). Because the proteolytical activities of both microsomal preparations were comparable, we performed experiments as previously described by Matthias *et al.* (2011).

Briefly, 0.25 mg/ml of BLG or CL-BLG were digested by 0.4 mg/ml of microsomal proteins in 20  $\mu$ l of 100mM citrate buffer pH 4.8 in the presence of 2mM dithiothreitol at 37°C. After 0, 3, 6, 12, 24, 36, and 48 h reactions were stopped by heating at 95°C for 5 min. Digestion mixtures were run on 14% SDS-PAGE under reducing conditions. Protein bands were visualized by silver staining. Qualitative analysis of digested samples was performed by LC-ESI MS/MS (Supplementary data). For data visualization web-based MS-Tools were used (Kavan and Man, 2011). The major histocompatibility complex class II (MHCII) binding predictions were made on 19 September 2013 using the Immune Epitope Database (IEDB) analysis resource SMM-Align (version 1.1) tool and RANKPEP (Nielsen *et al.*, 2007; Reche and Reinherz, 2007). From SMM-Align analysis only peptides with IC<sub>50</sub> values below 5000nM (upper limit for all known T-cell epitopes) were considered as possible binders.

*Coculture of stimulated BMDCs with primed T cells.* For this experiment, BMDCs were directly exposed to proteins and cytokines secreted by CD4<sup>+</sup> T cells were measured upon incubation with stimulated BMDCs as described before (Pochard *et al.*, 2010). C3H/HeOuJ mice were chosen instead of BALB/c due to the establishment of this model in this strain and their higher resistance to endotoxin. BLG-specific CD4<sup>+</sup> T cells were obtained from spleens of mice immunized with BLG and aluminum hydroxide (ALUM, Sigma-Aldrich). On days 0 and 7, mice were intraperitoneally injected with 100  $\mu$ g of BLG and 1 mg of ALUM. Bone marrow cells were cultured and differentiated into BMDC as described above. On day 13, incubations of BMDCs with 50  $\mu$ g/ml of BLG or CL-BLG were started. On day 14, CD4<sup>+</sup> T cells were isolated from splenocyte suspensions by using DynalMouse CD4 Negative Isolation Kit (Invitrogen, Life Technologies). After a 24-h stimulation with BLG or CL-BLG, on day 14, BMDCs were scraped, washed, and transferred to a 96-well plate where they were cocultured (1:10 cell number ratio) with freshly isolated CD4<sup>+</sup> T cells for the next 72 h. Subsequently, levels of IFN- $\gamma$ , IL-5, IL-13, and cell proliferation were measured as mentioned above. Three independent experiments were performed.

*Statistical analysis.* Data are presented as mean  $\pm$  standard error of the mean (SEM) and analyzed using GraphPad Prism software (La Jolla, CA). Data were log-transformed to obtain



a normal distribution and then compared using Student's *t*-test. Differences were considered significant if *p*-value was <0.05.

## RESULTS

### *Cross-Linking Induced Formation of High Molecular Weight BLG Structures*

BLG is 18 kDa. To determine the molecular weight of CL-BLG, electrophoresis on agarose gel was carried out. However, as seen in Figure 1A, CL-BLG poorly migrated from the application site. As reference proteins myosine (heavy chain, 220 kDa), nebulin (800 kDa), and titin (around 3000 kDa) from mouse muscle protein extract (MMPE) were used. From the log(Mw) versus retention factors (Rf) curve, molecular weight of CL-BLG was calculated to be  $\geq 50$ –60 MDa. In addition, SEM was used for the determination of shape and morphology of CL-BLG. Although CL-BLG particles are not uniform in size, their morphology is similar. CL-BLG particles are built from long protein fibers  $\sim 60$  nm wide (Fig. 1B). Fibers are intertwined and form a network that may further ensure CL-BLG stability, as known for other biological systems (Maina, 2007).

### *Cross-Linking of BLG Enhanced Sensitization but Reduced Mast Cell Degranulation*

Hereafter, we investigated whether cross-linking of BLG changed its immunogenicity and allergenicity *in vivo*. Mice sensitized to CL-BLG generated a significantly higher IgE, IgG1, and IgG2a response when compared with mice sensitized to BLG (Fig. 2A). Increase in IgG2a serum levels was not as pronounced as increases in levels of IgE and IgG1. Upon oral challenge with BLG, serum levels of mMCP-1 (as a measure of mast cell degranulation) were similar in mice sensitized with BLG or CL-BLG. However, an oral challenge with CL-BLG induced significantly lower mast cell degranulation in BLG-sensitized mice, compared with the BLG challenge (Fig. 2B).

Both BLG and CL-BLG sensitization led to an increase in IL-13 production in spleen cultures restimulated with BLG. The levels of INF- $\gamma$  were not significantly different than in the control group and IL-5 could not be detected. T-cell proliferation was significantly higher than controls only in CL-BLG-sensitized mice (Fig. 2C).

### *Cross-Linking Altered BLG Sampling in the Gut and Resistance to Proteolysis*

Susceptibility to gastrointestinal degradation and site of antigen absorption are important factors influencing allergenicity and immunogenicity of food allergens (Moreno *et al.*, 2005). Therefore, we investigated BLG and CL-BLG transport across polarized Caco-2 cell monolayer *in vitro*, a model of intestinal barrier function. Transport of CL-BLG was significantly reduced when compared with BLG, even at a 10 times higher concentration of CL-BLG (Fig. 3A).

The uptake of BLG and CL-BLG was also evaluated *in vivo*. Both FITC-labeled BLG and CL-BLG were detected in the lamina propria of small intestinal villi already 15 min after ingestion. Consistent with its particulate nature, CL-BLG was detected after 30 min in the follicular and interfollicular areas of Peyer's patches (PPs) (Fig. 3B). BLG was not detected in PPs. Interestingly, after 30 min, enhanced CL-BLG uptake in villi neighboring the PPs was seen. Proteins taken up by the intestinal cells had a dotted and granular appearance at high magnification as shown in Figure 3C on selected sections of villi and PPs.

To analyze protein susceptibility to gastrointestinal digestion, we performed simulated gastric digestion with pepsin followed by simulated intestinal digestion with pancreatin (mixture of enzymes from porcine pancreas). Digests were analyzed on 14% SDS-PAGE under reducing conditions (Fig. 4). Longer resistance of CL-BLG was observed as it was completely digested after 60 min whereas BLG was already processed within 5 min of simulated intestinal digestion. CL-BLG degradation proceeded through intermediates  $> 116$  kDa observed after 5, 15, and 30 min as smear in the stacking gel. These intermediates were not present in BLG digests indicating that they are originating from CL-BLG only and not from other proteins (present in pepsin and pancreatin preparation).

### *BLG and CL-BLG Display Distinct Patterns of Uptake by DCs*

To better understand T-cell responses elicited by BLG and CL-BLG, we monitored antigen uptake and endocytosis by BMDCs, *in vitro* endolysosomal degradation and subsequent presentation to CD4<sup>+</sup> T cells.

Uptake of fluorescently labeled BLG and CL-BLG by BMDCs was followed in time by flow cytometry. In addition to FITC, pHrodo Green dye was used to label proteins because it fluoresces brightly at the acidic pH and is almost nonfluorescent at neutral pH which makes this dye a good indicator for localization of BLG or CL-BLG in the endolysosomal compartments. FITC-labeled CL-BLG was attached and taken up to a lower extent when compared with FITC-BLG until 240 min when they reached the same level (Fig. 5A). Endocytosis of pHrodo-BLG was fast, reached its maximum within 30–60 min, then slowly decreased and reached saturation after 180 min. pHrodo-labeled CL-BLG was internalized at a much slower rate, which reached saturation between 180 and 240 min, like BLG (Fig. 5A). The biggest differences in protein internalization were observed within the first 30 min, when the percent of pHrodo-positive cells increased from 0.79 to 29.59 and 37.18% for BLG whereas it increased from 0.86 to 6.4 and 13.99% for CL-BLG, after 15 and 30 min, respectively (Fig. 5B).

### *CL-BLG Showed Different Susceptibility to Endolysosomal Proteolysis*

Because efficient antigen processing is of crucial importance for immunogenicity of proteins, we subjected BLG and CL-BLG to proteolysis by endolysosomal enzymes isolated from

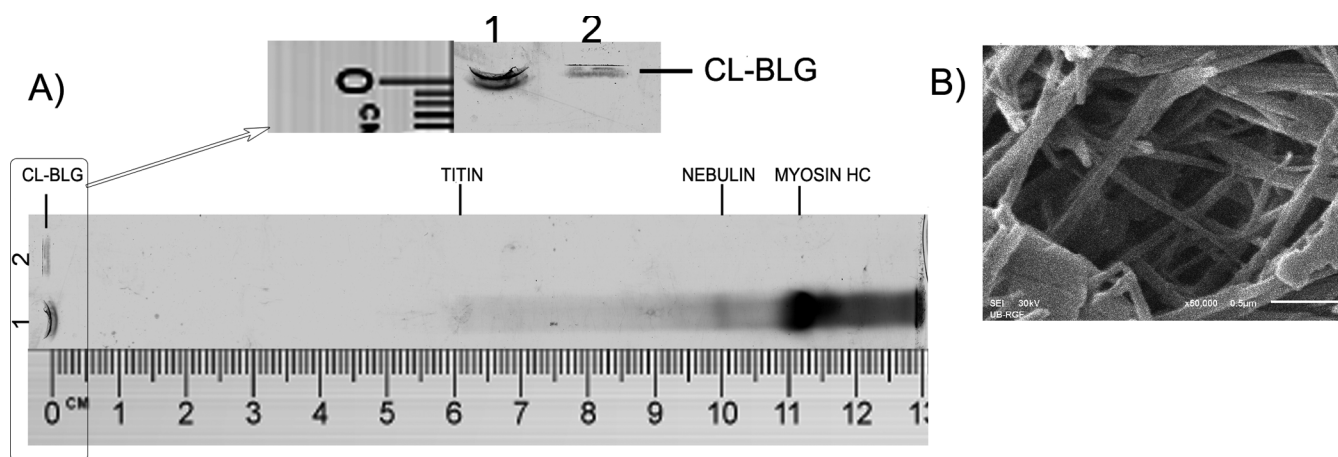

**FIG. 1.** Characterization of CL-BLG molecular weight and morphology. (A) Agarose gel electrophoresis after staining with CBB. Lane 1: mouse muscle protein extract (MMPE), myosin heavy chain, 220 kDa; nebulin, 800 kDa; titin, ~3000 kDa. Lane 2: 10  $\mu$ g of CL-BLG. Ruler is included for comparison with retention factors (Rf) published before for MMPE. (B) Scanning electron microscopy of CL-BLG at  $\times 50,000$  magnification. Scale bar corresponds to 0.5  $\mu$ m.

BMDCs. SDS-PAGE electrophoresis of digested samples revealed that BLG was degraded slowly in time with half-time  $>48$  h, but also that some proteolysis of CL-BLG occurred (Fig. 6). CL-BLG degradation proceeded through intermediates observed as smear in the stacking gel (mostly noticed after 3, 6, and 12 h of digestion).

BLG peptides identified in the samples were used for generation of peptide maps that provide insight into peptide profile and identification of potential T-cell determinants (Fig. 7). Peptides from both BLG and CL-BLG appeared in seven nested clusters (start-end amino-acid): 1–19, 20–42, 42–57, 58–81, 83–103, 123–145, and 146–162. Peptides from one cluster share common core and have variable lateral regions. The most abundant peptide cluster for BLG was 123–145, whereas peptides from C-terminus (146–162) were the least present. Peptides from the central region of BLG (58–81, 83–103) appeared mainly later, after 24 h. Although CL-BLG releasing peptides share common clusters with BLG, their overall distribution is different. When compared with BLG, CL-BLG provided higher number of peptides in clusters 42–57 (dominant), 20–42 (abundant), and 146–162 but lower number of peptides in clusters 1–19, 123–145, whereas peptides from the central core region were rarely present.

For prediction of core sequences of peptides binding to H-2 class II molecules IAd and IE d that are MHC II molecules expressed in BALB/c mice we used RANKPEP and IEDB analysis resource SMM-Align. Peptides from clusters 1–19, 20–42, 58–81 and 123–145 are listed as possible candidates (Fig. 7).

#### *CL-BLG Primed DCs Induced Th2 Response of BLG-specific CD4<sup>+</sup> T Cells*

Finally, we investigated whether cross-linking of BLG interfered with antigen presentation by DCs *in vitro*. CL-BLG loaded DCs induced higher IL-13 and lower INF- $\gamma$  levels accompa-

nied by elevated T-cell proliferation when compared with naïve or BLG primed DCs. Both BLG- and CL-BLG-pulsed DCs induced IL-5 production but with no significant difference among the groups (Fig. 8). Peptides occurring from CL-BLG endolysosomal digestion when presented with MHC II complex on the surface of DCs induced stronger activation and Th2 response of BLG-specific CD4<sup>+</sup> T cells.

## DISCUSSION

Protein cross-linking in food occurs naturally or during processing (Singh, 1991). By changing type and extent of cross-linking, food industry can modulate food texture and improve food functionality. Although cross-linking of food proteins has been carried out extensively, little is known about the health risks of these new food biopolymers. Having in mind that foods subjected to cross-linking, such as peanut and dairy products, are sources of potent food allergens, it is necessary to perform immunogenicity and allergenicity assessment of these novel protein derivatives. By using laccase cross-linked BLG (CL-BLG) as a model of efficiently polymerized proteins, we have investigated the effect of cross-linking on protein capacity to induce sensitization and allergic response using a mouse model of food allergy with relevant clinical read-out parameters.

In our mouse studies, allergic sensitization to CL-BLG was more prominent when compared with BLG, as shown by a significantly higher production of BLG-specific IgG1 and IgE. In contrast, cross-linking of BLG reduced its capacity to induce mast cell degranulation in BLG-sensitized mice. Although CL-BLG-sensitized mice had higher levels of BLG-specific IgE, release of protease-1 during mast cell degranulation did not differ upon oral challenge with BLG when compared with mast cell responses to BLG in BLG-sensitized mice. This higher allergenic capacity (as measured by IgE) but lower actual aller-

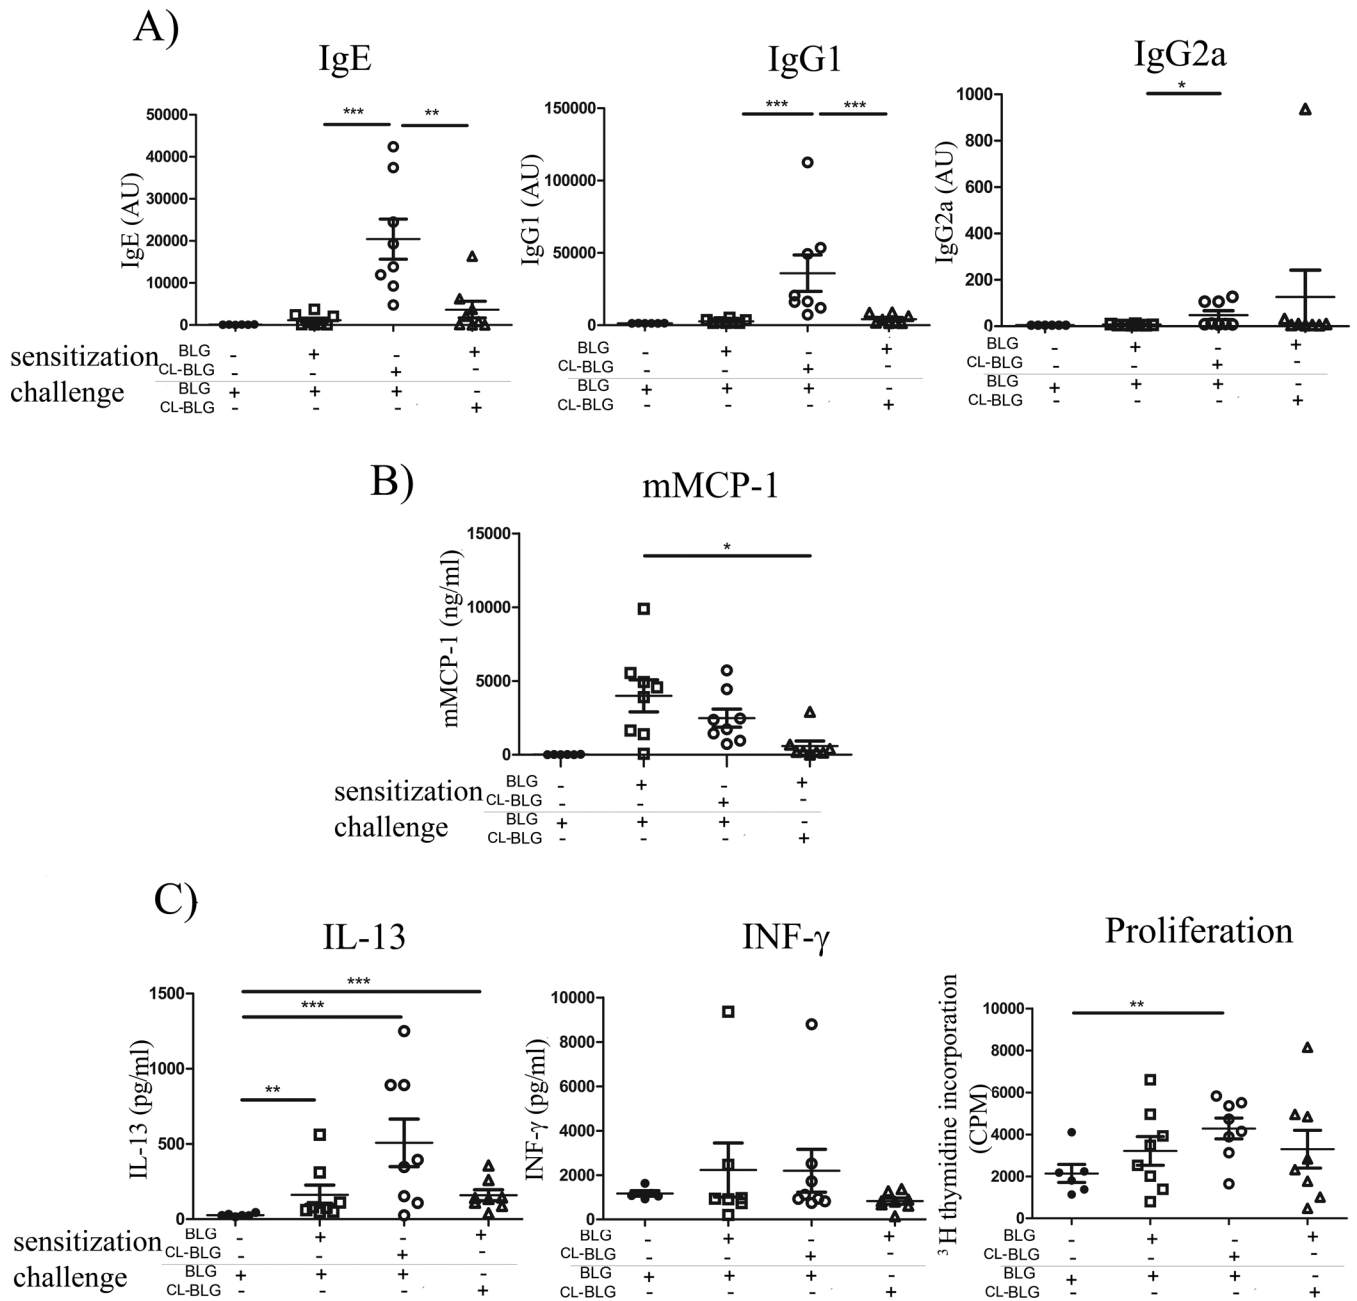

**FIG. 2.** Immunogenicity and allergenicity of BLG and CL-BLG *in vivo*. (A) BLG-specific IgE, IgG1 and IgG2a in serum before the challenge. (B) mMCP-1 in serum obtained within 60 min after the oral challenge. (C) T-cell restimulation with BLG: levels of IL-13, INF- $\gamma$ , and cell proliferation. \*\*\* $p < 0.001$ , \*\* $p < 0.005$ , \* $p < 0.05$ .

gic effector response (as measured by mast cell degranulation) of CL-BLG, suggests that intestinal transport and processing of this protein derivative is altered. This may have led to less protein reaching the mast cells in the intestine. Indeed, changes in intestinal transport and digestibility between BLG and CL-BLG were observed in the following *in vitro* and *in vivo* experiments. Soluble BLG, but not CL-BLG was efficiently transported by Caco-2 cells. Remarkably, *in vivo* transport of BLG occurred

through enterocytes only, whereas transport of CL-BLG occurred through both the enterocytes and M cells lining the PPs. Higher resistance of CL-BLG to gastric and intestinal proteolysis, as observed *in vitro*, may have induced kinetics as well as route of protein's uptake in the gut, as observed *in vivo*. In accordance with our results, Roth-Walter *et al.* (2008) reported that pasteurization formed aggregates of whey proteins (BLG and  $\alpha$ -lactalbumin) promoted stronger allergic sensitization and



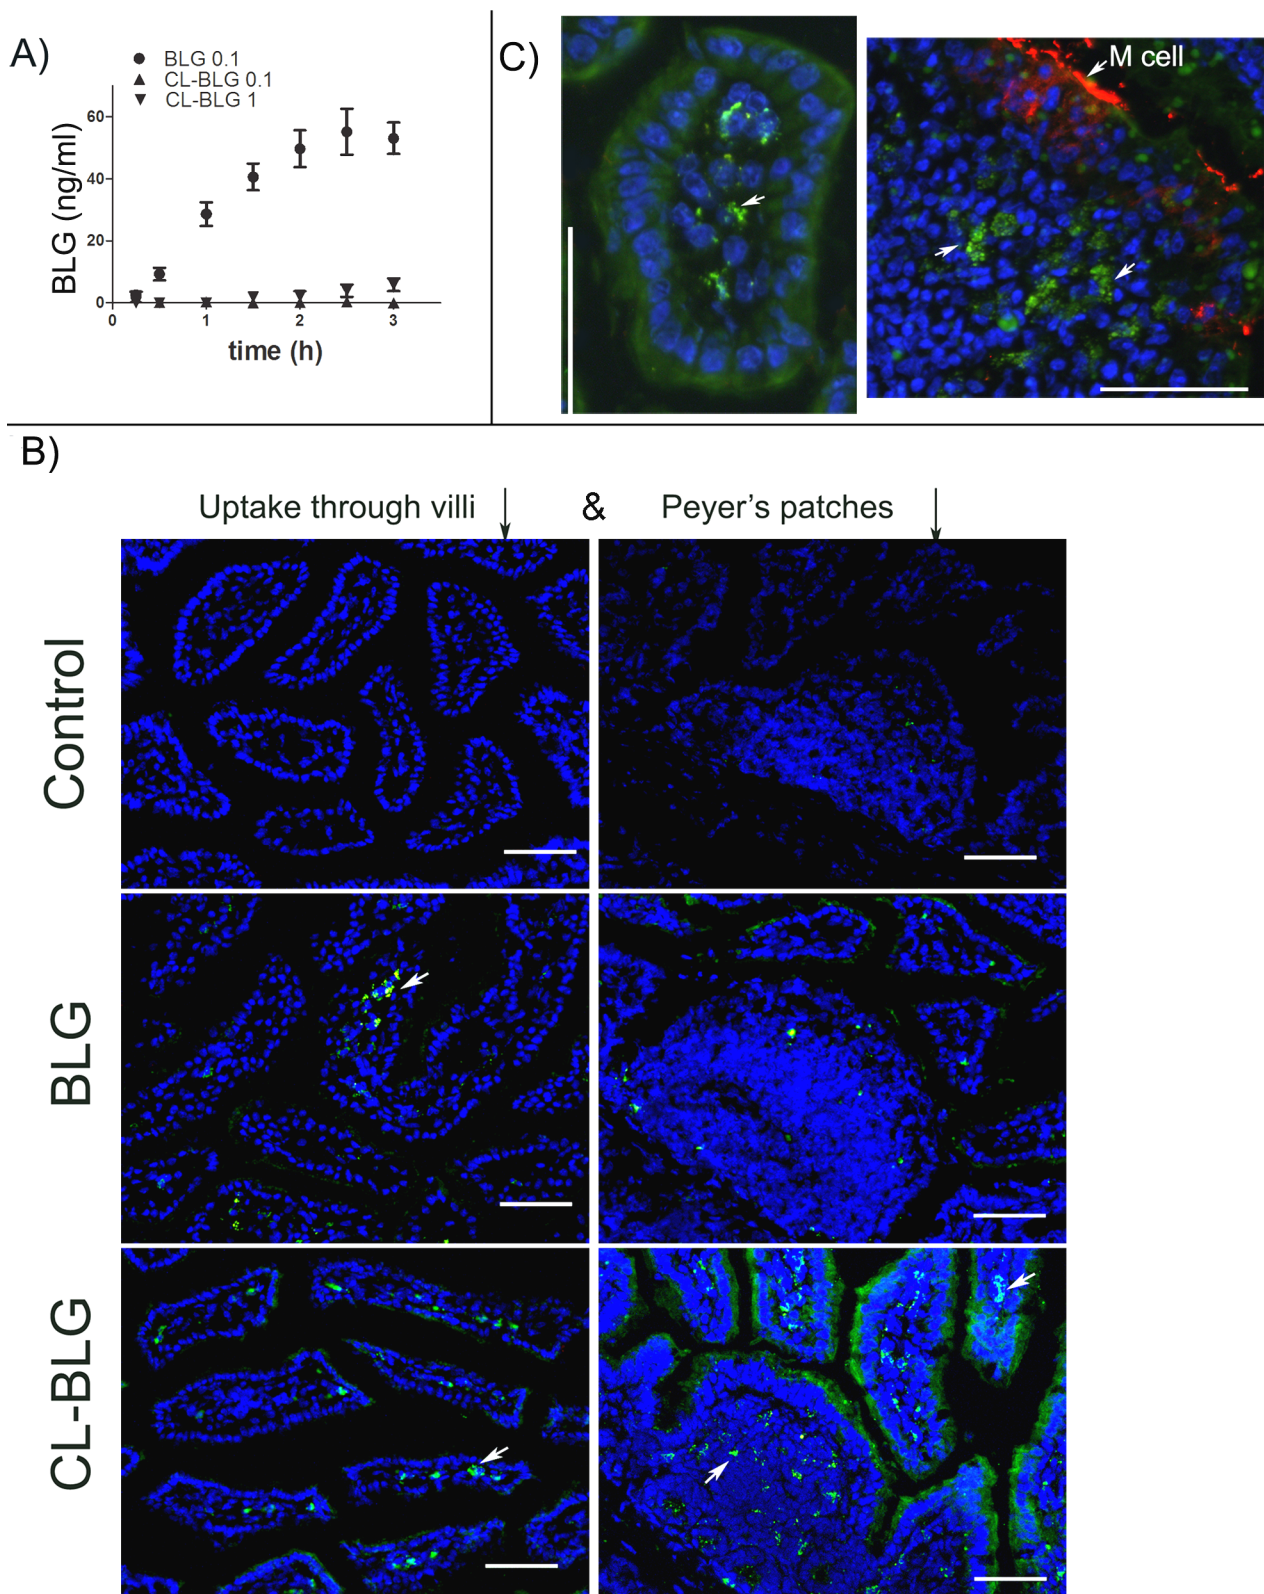

**FIG. 3.** Bioavailability of BLG and CL-BLG *in vitro* and *in vivo*. (A) Transcytosis of proteins (0.1 mg/ml BLG, 0.1 or 1 mg/ml CL-BLG) across Caco-2 monolayer. (B) FITC-labeled BLG and CL-BLG uptake through villi 15 min after feeding and Peyer's patches after 30 min. Control-mice fed with PBS. (C) Selected sections showing proteins taken up inside a vilus (BLG 15 min) and part of Peyer's patch (CL-BLG 30 min). M-cells were stained in red by GP-2 immunostain. Scale bars correspond to 100  $\mu$ m.

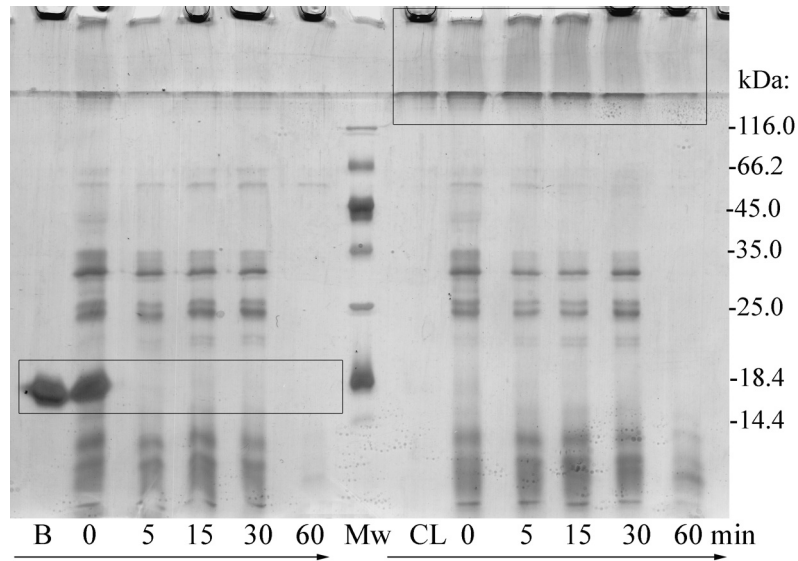

**FIG. 4.** Simulated gastric and intestinal digestion. Pepsin digestion was stopped after 60 min and mixture of pancreatic enzymes was added. Digestion continued for 0, 5, 15, 30, and 60 min. Subsequently, digests were analyzed on 14% SDS-PAGE under reducing conditions. Rectangles are marking BLG (B) band, CL-BLG (CL) high molecular weight degradation intermediates. Another bands present in BLG and CL-BLG digests are originating mainly from pepsin and pancreatin. Mw, molecular weight markers.

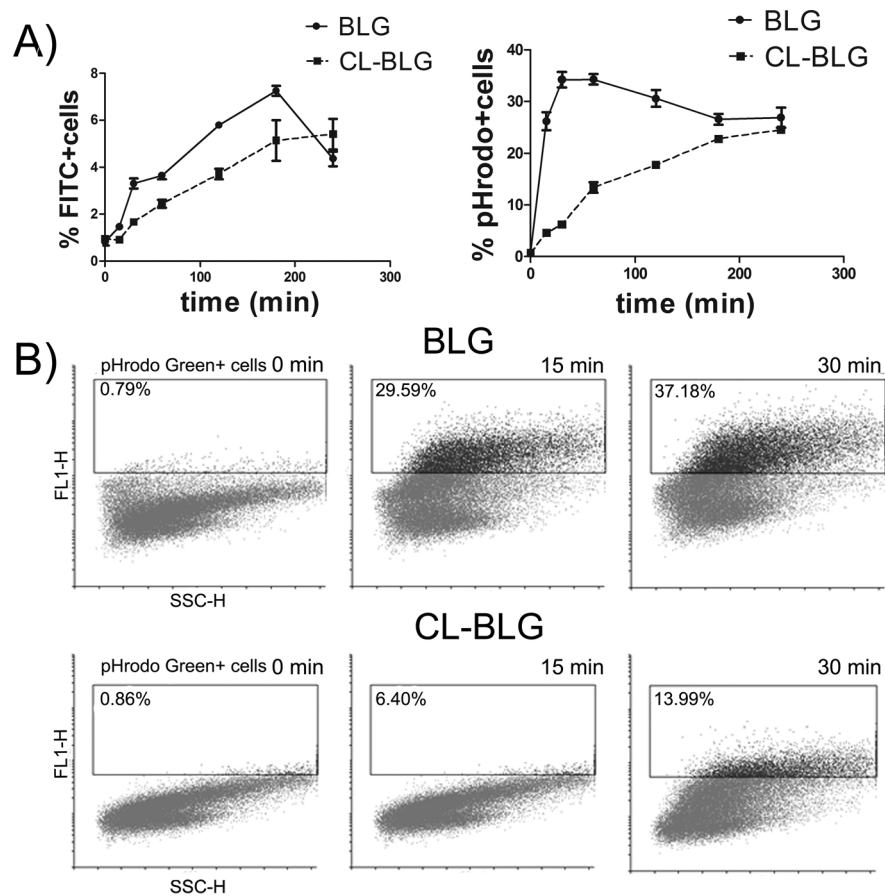

**FIG. 5.** Uptake of FITC or pHrodo Green labeled BLG and CL-BLG by DCs. (A) Number of positive cells over time. (B) One representative pHrodo positive cell gating profile out of three experiments for 0, 15, and 30 min time points.



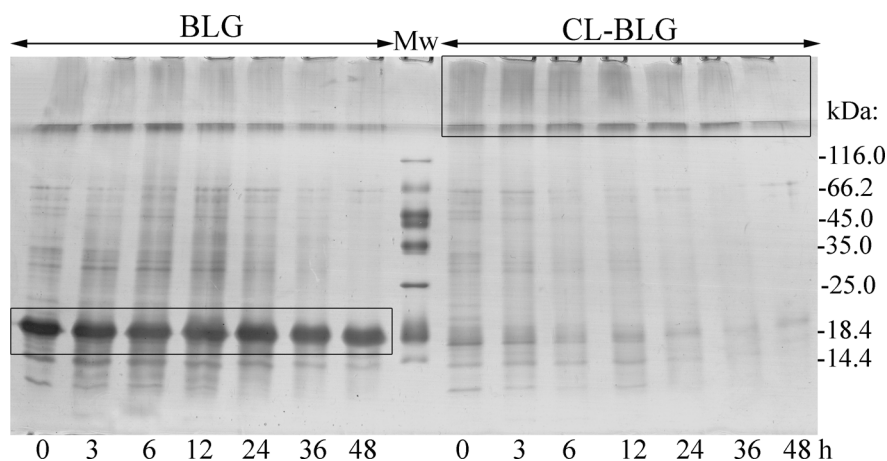

**FIG. 6.** SDS-PAGE analysis of time dependent endolysosomal degradation of BLG and CL-BLG. Rectangles are marking BLG band, CL-BLG high molecular weight degradation intermediates. Mw, molecular weight protein markers.

triggered lower anaphylactic response *in vivo*. These aggregates were also preferentially taken up through M cells as opposed to the native proteins which were transported through enterocytes. However, in two recently published studies, treatment of peanut proteins with tyrosinase or milk casein with transglutaminase did not change protein-sensitizing capacity in animal models of food allergy (Radosavljevic *et al.*, 2013; van Esch *et al.*, 2013). From our finding that cross-linking has a profound effect on the route of uptake, we hypothesize that enhancement of immune responses to protein aggregates or polymers will only occur for food proteins that are normally transported through enterocytes, such as BLG. Aggregation of such proteins by processing, such as pasteurization, or by a combination of enzymatic and physicochemical methods, as applied in our study, could result in strong allergic sensitization because their routes of entrance is directed from enterocytes to M cells of PPs. In contrast, in case of proteins such as casein and peanut allergens that are already preferentially transported to PPs (Chambers *et al.*, 2004; Roth-Walter *et al.*, 2008), an increase in immunogenicity will not happen after processing-induced protein polymerization.

To further explain the increased CL-BLG immunostimulating capacity observed *in vivo*, we inspected protein interactions with DCs *in vitro*. Generally, it is considered that uptake, processing and presentation on the surface of antigen presenting cells such as DCs determines the type and severity of immune response (Vyas *et al.*, 2008). Because endocytosis of BLG was impaired by cross-linking, cell-bound CL-BLG was slowly delivered to microsomal enzymes in endolysosomal compartments. Analysis of peptides from endolysosomal digests of CL-BLG revealed a different peptide profile when compared with native BLG. CL-BLG provided less peptides from the central core of protein (accessibility reduced after cross-linking), but provided more peptides from the N- and C-terminus. Because Matthias *et al.* (2011) showed that the composition, activity and specificity of proteases from

endolysosomal preparations of human and murine DCs are similar, proteolysis of BLG and CL-BLG will follow similar kinetics in DCs regardless of their origin. Among the peptides that were identified in the samples after endolysosomal degradation, we identified the major T-cell epitopes of BLG. In agreement with previously published results (Inoue *et al.*, 2001; Sélo *et al.*, 1999; Tsuji *et al.*, 1993), we report that cluster 42–57 for which CL-BLG provided constantly higher number of peptides is probably T-cell immunodominant epitope. Also, after aligning our data with theoretical predictions, we propose that peptides in the cluster 20–42 may (co)determine higher immunogenicity of CL-BLG. Indeed, at the end, CL-BLG-primed DCs induced elevated expansion of BLG-specific T-cell clones and a markedly stronger Th2 response than monomeric protein. From our experience, when examining differences in immunogenicity between two structurally different proteins, except for monitoring resistance to intracellular cleavage by endolysosomal proteases (Kimber and Dearman, 2002), it is important to analyze and identify released peptides. Among those peptides are the ones primarily responsible for T-cell stimulation, type and severity of subsequent immune response (immunodominant T-cell epitopes).

In summary, processing of BLG into high molecular weight particles elicited stronger allergic sensitization in mice due to enhanced resistance to gastrointestinal proteolysis, redirected protein transport to PPs, changed uptake and processing in antigen presenting cells. Thus, antigen delivery to PPs and susceptibility to endolysosomal degradation may be important predictors of dietary protein's immunogenicity. Our findings suggest that BLG aggregates or polymers may elevate the risk of cow's milk allergy in humans, although clinical trials are needed for validation. In addition, although not necessarily translatable to all other soluble proteins, this study underlines the potential risk of their aggregated and/or cross-linked derivatives in the induction of food allergic sensitization.

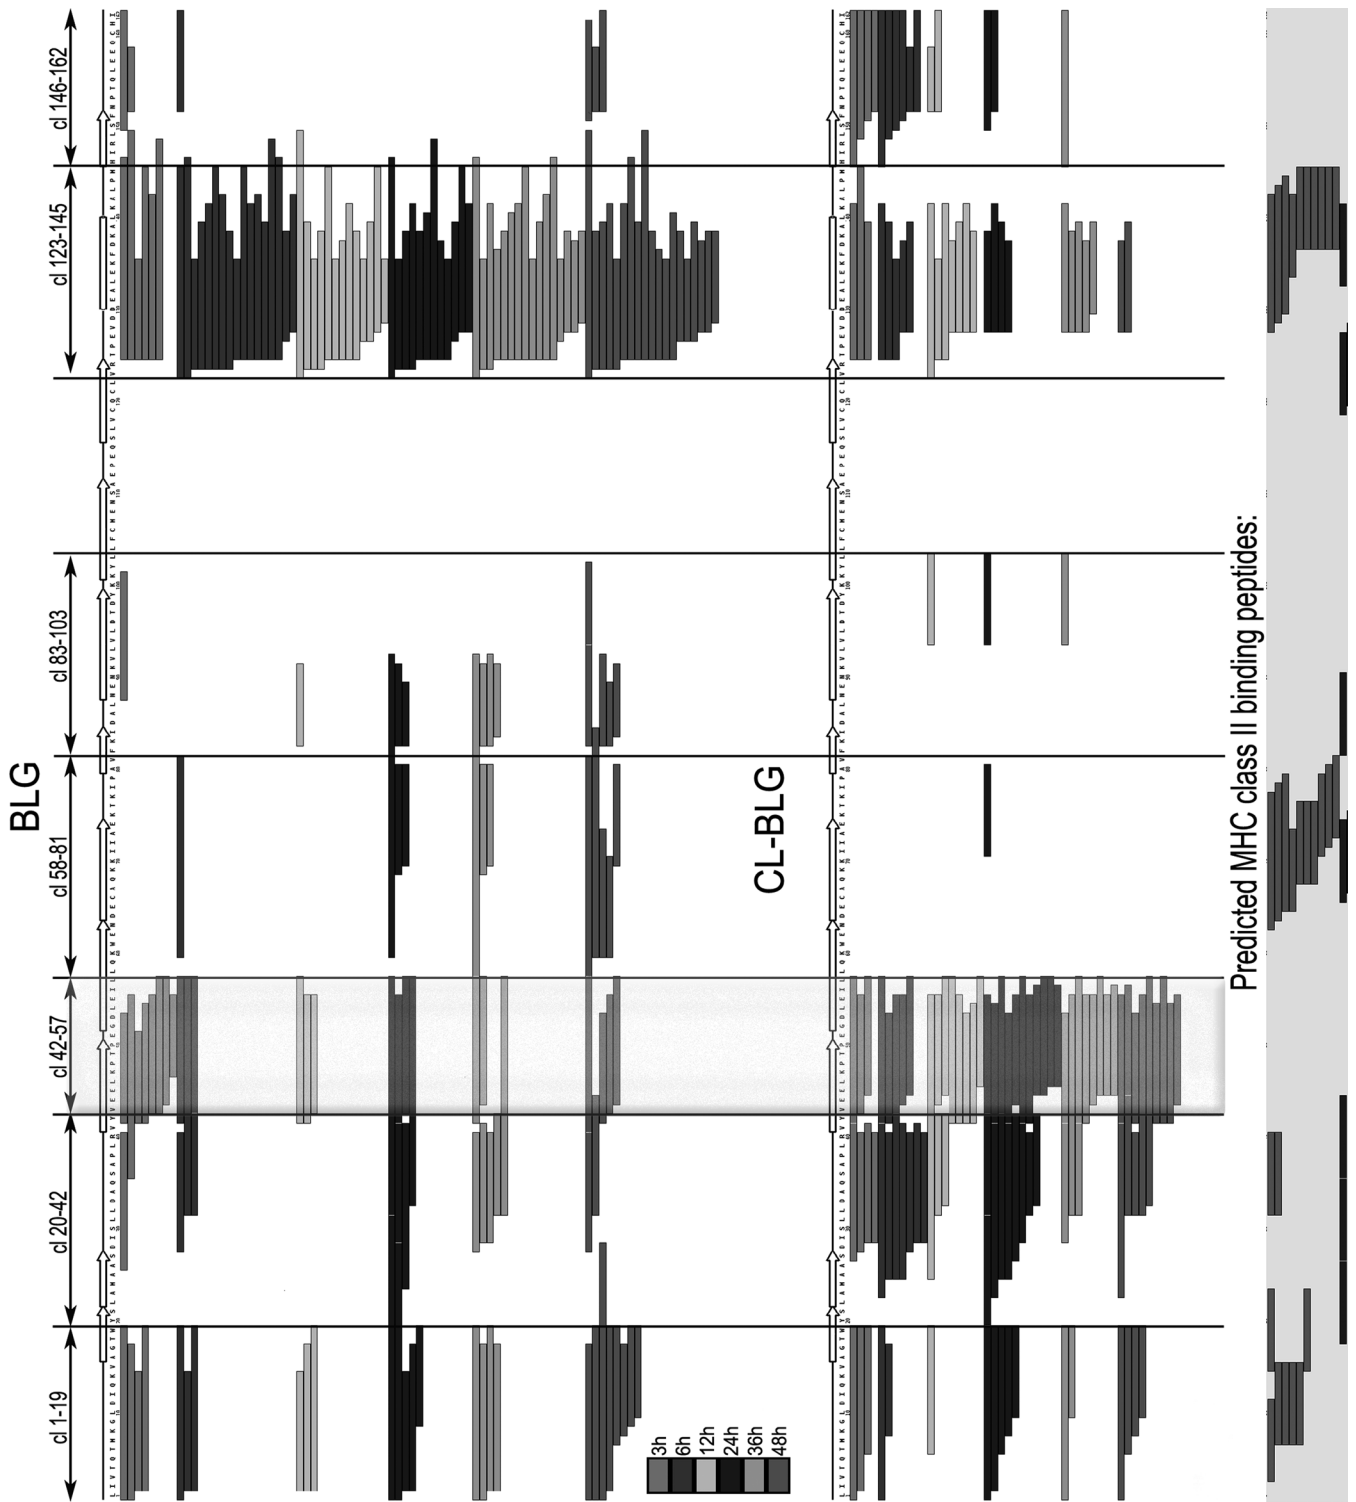

**FIG. 7.** Chronology chart of peptides released during 3, 6, 12, 24, 36, and 48 h of endolysosomal processing of BLG and CL-BLG. Predicted MHC II binding peptides for IAD and IEd alleles are aligned on the right. Peptides from cluster 42–57 (cl<sub>x-x</sub>) were reported to be immunodominant in T-cell clones from BALB/c mice and cow’s milk allergic patients.

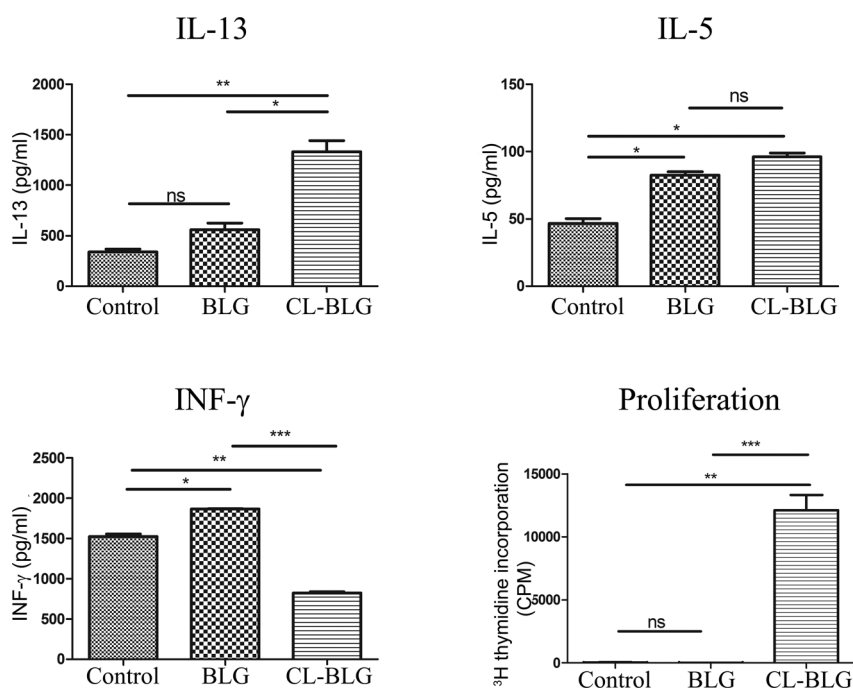

**FIG. 8.** Stimulation of BLG-specific CD4<sup>+</sup> T cells by BLG or CL-BLG primed BMDCs. Levels of IL-13, IL-5, IFN- $\gamma$ , and cell proliferation were determined. Control, T cells cocultured with naïve DCs. One experiment out of three independent experiments is shown. \*\*\* $p$  < 0.001, \*\* $p$  < 0.005, \* $p$  < 0.05.

#### SUPPLEMENTARY DATA

Supplementary data are available online at <http://toxsci.oxfordjournals.org/>.

#### FUNDING

Ministry of Education and Science of the Republic of Serbia (172024); FP7 RegPot project FCUB ERA (256716).

#### ACKNOWLEDGMENT

We thank Rob Bleumink for his assistance in *in vivo* transport study.

#### REFERENCES

- Buchert, J., Ercili Cura, D., Ma, H., Gasparetti, C., Monogioudi, E., Faccio, G., Mattinen, M., Boer, H., Partanen, R., Selinheimo, E., *et al.* (2010). Crosslinking food proteins for improved functionality. *Annu. Rev. Food Sci. Technol.* **1**, 113–138.
- Chambers, S. J., Wickham, M. S. J., Regoli, M., Bertelli, E., Gunning, P. A., and Nicoletti, C. (2004). Rapid *in vivo* transport of proteins from digested allergen across pre-sensitized gut. *Biochem. Biophys. Res. Commun.* **325**, 1258–1263.
- Chung, S.-Y., Kato, Y., and Champagne, E. T. (2005). Polyphenol oxidase/caffeic acid may reduce the allergenic properties of peanut allergens. *J. Sci. Food Agric.* **85**, 2631–2637.
- Clare, D. A., Gharst, G., and Sanders, T. H. (2006). Transglutaminase polymerization of peanut proteins. *J. Agric. Food Chem.* **55**, 432–438.
- Eissa, A. S., Puhl, C., Kadla, J. F., and Khan, S. A. (2006). Enzymatic cross-linking of  $\beta$ -lactoglobulin: Conformational properties using FTIR spectroscopy. *Biomacromolecules* **7**, 1707–1713.
- EU regulation (EC) No. 1332/2008 of the European Parliament and of the Council of 16 December 2008 on food enzymes and amending Council Directive 83/417/EEC, Council Regulation (EC) No. 1493/1999, Directive 2000/13/EC, Council Directive 2001/112/EC and Regulation (EC) No. 258/97.
- FAO/WHO (2001). *Evaluation of allergenicity of genetically modified foods. Report of a Joint FAO/WHO Expert Consultation.* Food and Agriculture Organization of the United Nations and World Health Organization. FAO, Rome, 2001.
- Food Directorate, Health Products and Food Branch, Health Canada (2006). Guidelines for the Safety Assessment of Novel Foods. June 2006.
- Inoue, R., Matsushita, S., Kaneko, H., Shinoda, S., Sakaguchi, H., Nishimura, Y., and Kondo, N. (2001). Identification of beta-lactoglobulin-derived peptides and class II HLA molecules recognized by T cells from patients with milk allergy. *Clin. Exp. Allergy* **31**, 1126–1134.
- ISO 5492. (2008). *Sensory Analysis—Vocabulary.* International Standard Organization.
- Kanjarawi, R., Dercamp, C., Etchart, N., Adel-Patient, K., Nicolas, J. F., Dubois, B., and Kaiserlian, D. (2011). Regulatory T cells control type I food allergy to Beta-lactoglobulin in mice. *Int. Arch. Allergy Immunol.* **156**, 387–396.
- Kavan, D., and Man, P. (2011). MSTools—Web based application for visualization and presentation of HXMS data. *Int. J. Mass Spectrom.* **302**, 53–58.
- Kimber, I., and Dearman, R. J. (2002). Approaches to assessment of the allergenic potential of novel proteins in food from genetically modified crops. *Toxicol. Sci.* **68**, 4–8.



- Kontopidis, G., Holt, C., and Sawyer, L. (2004). Invited review: Beta-lactoglobulin: Binding properties, structure, and function. *J. Dairy Sci.* **87**, 785–796.
- Laemmli, U. K. (1970). Cleavage of structural proteins during the assembly of the head of bacteriophage T4. *Nature* **227**, 680–685.
- Leszczyńska, J., Łacka, A., and Bryszewska, M. (2006). The use of transglutaminase in the reduction of immunoreactivity of wheat flour. *Food Agric. Immunol.* **17**, 105–113.
- Lutz, M. B., Kukutsch, N., Ogilvie, A. L. J., Rößner, S., Koch, F., Romani, N., and Schuler, G. (1999). An advanced culture method for generating large quantities of highly pure dendritic cells from mouse bone marrow. *J. Immunol. Methods* **223**, 77–92.
- Maina, J. N. (2007). Spectacularly robust! Tensegrity principle explains the mechanical strength of the avian lung. *Respir. Physiol. Neurobiol.* **155**, 1–10.
- Matthias, E., Alexander, J., Michael, W., Peter, B., Silke, R., Stefan, H., Ulrike, P., Claudia, K., Barbara, B., Christian, G. H., *et al.* (2011). Assessing protein immunogenicity with a dendritic cell line-derived endolysosomal degradome. *PLoS One* **6**, e17278.
- Monogioudi, E., Faccio, G., Lille, M., Poutanen, K., Buchert, J., and Mattinen, M.-L. (2011). Effect of enzymatic cross-linking of  $\beta$ -casein on proteolysis by pepsin. *Food Hydrocolloid* **25**, 71–81.
- Moreno, F. J., Mackie, A. R., and Mills, E. N. (2005). Phospholipid interactions protect the milk allergen alpha-lactalbumin from proteolysis during in vitro digestion. *J. Agric. Food Chem.* **53**, 9810–9816.
- Nakano, T., Shimojo, N., Morita, Y., Arima, T., Tomiita, M., and Kohno, Y. (2010). Sensitization to casein and beta-lactoglobulin (BLG) in children with cow's milk allergy (CMA). *Arerugi* **59**, 117–122.
- Natale, M., Bisson, C., Monti, G., Peltran, A., Garoffo, L. P., Valentini, S., Fabris, C., Bertino, E., Coscia, A., and Conti, A. (2004). Cow's milk allergens identification by two-dimensional immunoblotting and mass spectrometry. *Mol. Nutr. Food Res.* **48**, 363–369.
- Nielsen, M., Lundegaard, C., and Lund, O. (2007). Prediction of MHC class II binding affinity using SMM-align, a novel stabilization matrix alignment method. *BMC Bioinformatics* **8**, 238.
- Palosuo, K., Varjonen, E., Nurkka, J., Kalkkinen, N., Harvima, R., Reunala, T., and Alenius, H. (2003). Transglutaminase-mediated cross-linking of a peptic fraction of omega-5 gliadin enhances IgE reactivity in wheat-dependent, exercise-induced anaphylaxis. *J. Allergy Clin. Immunol.* **111**, 1386–1392.
- Pochard, P., Vickery, B., Berin, M. C., Grishin, A., Sampson, H. A., Caplan, M., and Bottomly, K. (2010). Targeting Toll-like receptors on dendritic cells modifies the Th2 response to peanut allergens in vitro. *J. Allergy Clin. Immunol.* **126**, 92–97.
- Radosavljevic, J., Nordlund, E., Mihajlovic, L., Krstic, M., Bohn, T., Buchert, J., CirkovicVelickovic, T., and Smit, J. (2014). Sensitizing potential of enzymatically cross-linked peanut proteins in a mouse model of peanut allergy. *Mol. Nutr. Food Res.* **58**, 635–646.
- Reche, P. A., and Reinherz, E. L. (2007). Prediction of peptide-MHC binding using profiles. *Methods Mol. Biol.* **409**, 185–200.
- Roth-Walter, F., Berin, M. C., Arnaboldi, P., Escalante, C. R., Dahan, S., Rauch, J., Jensen-Jarolim, E., and Mayer, L. (2008). Pasteurization of milk proteins promotes allergic sensitization by enhancing uptake through Peyer's patches. *Allergy* **63**, 882–890.
- Sélo, I., Clément, G., Bernard, H., Chatel, J.-M., Créminon, C., Peltre, G., and Wal, J.-M. (1999). Allergy to bovine  $\beta$ -lactoglobulin: Specificity of human IgE to tryptic peptides. *Clin. Exp. Allergy* **29**, 1055–1063.
- Singh, H. (1991). Modification of food proteins by covalent crosslinking. *Trends Food Sci. Tech.* **2**, 196–200.
- Stanic-Vucinic, D., Stojadinovic, M., Atanaskovic-Markovic, M., Ognjenovic, J., Grönlund, H., van Hage, M., Lantto, R., Sancho, A. I., and Cirkovic Velickovic, T. (2012). Structural changes and allergenic properties of  $\beta$ -lactoglobulin upon exposure to high-intensity ultrasound. *Mol. Nutr. Food Res.* **56**, 1894–1905.
- Stanić-Vučinić, D., and Ćirković Veličković, T. (2013). The modifications of bovine  $\beta$ -lactoglobulin—Effects on its structural and functional properties. *J. Serb. Chem. Soc.* **78**, 445–461.
- Stanic, D., Monogioudi, E., Dilek, E., Radosavljevic, J., Atanaskovic-Markovic, M., Vuckovic, O., Lantto, R., Mattinen, M., Buchert, J., and Cirkovic Velickovic, T. (2010). Digestibility and allergenicity assessment of enzymatically crosslinked beta-casein. *Mol. Nutr. Food Res.* **54**, 1273–1284.
- Swain, M., and Ross, N. W. (1995). A silver stain protocol for proteins yielding high resolution and transparent background in sodium dodecyl sulfate-polyacrylamide gels. *Electrophoresis* **16**, 948–951.
- Tantoush, Z., Stanic, D., Stojadinovic, M., Ognjenovic, J., Mihajlovic, L., Atanaskovic-Markovic, M., and Cirkovic Velickovic, T. (2011). Digestibility and allergenicity of  $\beta$ -lactoglobulin following laccase-mediated cross-linking in the presence of sour cherry phenolics. *Food Chem.* **125**, 84–91.
- Thomas, K., Aalbers, M., Bannon, G. A., Bartels, M., Dearman, R. J., Esdaile, D. J., Fu, T. J., Glatt, C. M., Hadfield, N., Hatzos, C., *et al.* (2004). A multi-laboratory evaluation of a common in vitro pepsin digestion assay protocol used in assessing the safety of novel proteins. *Regul. Toxicol. Pharmacol.* **39**, 87–98.
- Tsuji, N. M., Kurisaki, J.-i., and Mizumachi, K. (1993). Establishment of CD4<sup>+</sup> T cell clones specific to bovine beta-lactoglobulin and analysis of their specificity. *J. Biochem.* **113**, 545–548.
- van Esch, B. C., Gros-van Hest, M., Westerbeek, H., and Garssen, J. (2013). Sensitizing capacity and allergenicity of enzymatically cross-linked sodium caseinate in comparison to sodium caseinate in a mouse model for cow's milk allergy. *Toxicol. Lett.* **218**, 50–55.
- Vyas, J.M., Van der Veen, A.G., and Ploegh, H.L. (2008). The known unknowns of antigen processing and presentation. *Nat. Rev. Immunol.* **8**, 607–618.
